# Supplementary material for: Zonarol Protected Liver from Methionine- and Choline-Deficient Diet-Induced Nonalcoholic Fatty Liver Disease in a Mouse Model
Source: MDPI journal article supplement (doi:10.3390/nu13103455), 2021-09-29
Supplement: s1 [file s1]

**Table S1.** Antibody used in this study.

| Antibody                                             | Manufacturer                                | Catalog No. |
|------------------------------------------------------|---------------------------------------------|-------------|
| $\beta$ -Actin                                       | Cell Signaling Technology                   | #4970       |
| SREBP-1/2                                            | Bioss                                       | bs-1402R    |
| PPAR $\gamma$                                        | Abcam                                       | ab59256     |
| IL-1 $\beta$                                         | Cell Signaling Technology                   | #12242      |
| TNF- $\alpha$                                        | Abcam                                       | ab66579     |
| NF- $\kappa$ B                                       | Cell Signaling Technology                   | #8242       |
| Nrf2                                                 | Gene Tex                                    | GTX103322   |
| HO-1                                                 | Cell Signaling Technology                   | #43966      |
| NQO1                                                 | Santa Cruz                                  | sc-32793    |
| keap1                                                | Abcam                                       | ab139729    |
| Akt                                                  | Cell Signaling Technology                   | #9272       |
| phosphor-Akt                                         | Cell Signaling Technology                   | #9271       |
| PI3K                                                 | Cell Signaling Technology                   | #4257       |
| phosphor-PI3K                                        | Cell Signaling Technology                   | #4228       |
| Anti-rabbit IgG                                      | Cell Signaling Technology                   | #7074       |
| Anti-mouse IgG                                       | Cell Signaling Technology                   | #7076       |
| Anti-Mouse/Human<br>Mac-2 Antibody                   | Cedarlane                                   | CL8942AP    |
| anti-human $\alpha$ -smooth muscle<br>actin antibody | Dako Cytomation                             | M0851       |
| 8-OHdG                                               | Japan Institute for the Control<br>of Aging | MOG-100P    |
